# Supplementary material for: Breast cancer epidemiology in women from colombian caribbean region during 2018-2021
Source: bioRxiv or medRxiv preprint supplement (doi:10.1101/2023.08.24.23294568), 2023-08-25
Supplement: Supplementary file [file media-1.pdf]

## ANNEX 1. RESULT CHARTS

**Chart 1. Rates x 100,000 of Incidence (PCNR), Prevalence and Mortality due to invasive breast cancer in departments from the Colombian Caribbean Region during 2018 to 2021**

|                   |             | Años | Atlántico        | Bolívar        | Cesar        | Córdoba        | La Guajira        | Magdalena        | San Andrés        | Sucre        |
|-------------------|-------------|------|------------------|----------------|--------------|----------------|-------------------|------------------|-------------------|--------------|
| <b>Incidence</b>  | <b>2021</b> |      | 25,21            | 24,56          | 16,37        | 17,81          | 20,19             | 15,49            | 15,57             | 13,80        |
|                   | <b>2020</b> |      | 22,20            | 28,67          | 15,69        | 20,55          | 13,62             | 14,48            | 10,75             | 18,11        |
|                   | <b>2019</b> |      | 15,95            | 23,10          | 14,29        | 16,82          | 9,26              | 16,36            | 6,46              | 12,72        |
|                   | <b>2018</b> |      | 17,75            | 24,76          | 22,50        | 13,42          | 5,25              | 14,62            | 42,59             | 12,05        |
| <b>Prevalence</b> |             |      | <b>Atlántico</b> | <b>Bolívar</b> | <b>Cesar</b> | <b>Córdoba</b> | <b>La Guajira</b> | <b>Magdalena</b> | <b>San Andrés</b> | <b>Sucre</b> |
|                   | <b>2021</b> |      | 332,48           | 331,36         | 214,55       | 221,43         | 138,79            | 223,61           | 283,43            | 216,77       |
|                   | <b>2020</b> |      | 267,89           | 301,09         | 191,33       | 188,71         | 118,58            | 212,49           | 262,21            | 212,24       |
|                   | <b>2019</b> |      | 223,44           | 250,16         | 191,12       | 158,22         | 78,35             | 227,95           | 183,28            | 189,30       |
| <b>Mortality</b>  |             |      | <b>Atlántico</b> | <b>Bolívar</b> | <b>Cesar</b> | <b>Córdoba</b> | <b>La Guajira</b> | <b>Magdalena</b> | <b>San Andrés</b> | <b>Sucre</b> |
|                   | <b>2021</b> |      | 18,76            | 14,62          | 9,93         | 11,89          | 9,32              | 15,26            | 15,81             | 14,43        |
|                   | <b>2020</b> |      | 14,75            | 14,86          | 9,30         | 9,01           | 8,80              | 15,96            | 25,16             | 10,27        |
|                   | <b>2019</b> |      | 11,42            | 12,54          | 10,26        | 7,42           | 4,88              | 12,82            | 6,51              | 10,34        |
|                   | <b>2018</b> |      | 11,92            | 14,06          | 11,55        | 8,49           | 4,89              | 9,97             | 9,02              | 10,09        |

From: Cuenta de Alto Costo, 2022

**Tabla 2. Crude incidence rates (PCNR) by age of invasive breast cancer in departments from the Colombian Caribbean Region during 2018 to 2021.**

| Age          | Atlántico  |       |       |        | Bolívar   |       |        |       | Cesar      |       |       |        | Córdoba |       |       |       |
|--------------|------------|-------|-------|--------|-----------|-------|--------|-------|------------|-------|-------|--------|---------|-------|-------|-------|
|              | 2018       | 2019  | 2020  | 2021   | 2018      | 2019  | 2020   | 2021  | 2018       | 2019  | 2020  | 2021   | 2018    | 2019  | 2020  | 2021  |
| <b>30-34</b> | 6,92       | 3,96  | 9,71  | 14,87  | 7,83      | 6,44  | 7,57   | 6,11  | 0,00       | 10,46 | 6,21  | 0,00   | 3,19    | 1,55  | 3,08  | 4,56  |
| <b>35-39</b> | 16,09      | 14,63 | 23,63 | 19,87  | 13,13     | 18,59 | 16,42  | 13,30 | 20,99      | 11,86 | 9,15  | 13,18  | 5,42    | 15,94 | 9,70  | 16,02 |
| <b>40-44</b> | 22,64      | 23,24 | 32,70 | 27,87  | 32,76     | 32,27 | 38,27  | 43,01 | 32,89      | 16,20 | 25,69 | 32,09  | 12,20   | 17,92 | 31,56 | 32,81 |
| <b>45-49</b> | 36,44      | 31,54 | 40,60 | 34,87  | 57,20     | 59,27 | 64,58  | 42,48 | 44,93      | 34,53 | 28,71 | 22,29  | 29,41   | 50,68 | 29,91 | 39,08 |
| <b>50-54</b> | 51,08      | 28,56 | 39,93 | 49,58  | 82,49     | 50,14 | 60,41  | 51,03 | 61,80      | 26,21 | 45,56 | 37,56  | 36,61   | 59,97 | 58,30 | 37,64 |
| <b>55-59</b> | 41,69      | 39,99 | 72,56 | 71,61  | 67,44     | 67,22 | 69,44  | 68,89 | 62,15      | 18,37 | 39,20 | 67,24  | 44,11   | 31,98 | 48,31 | 40,36 |
| <b>60-64</b> | 54,50      | 44,32 | 55,05 | 72,64  | 71,10     | 80,18 | 93,54  | 87,30 | 123,16     | 47,13 | 40,45 | 23,95  | 63,24   | 46,95 | 62,20 | 59,89 |
| <b>65-69</b> | 59,46      | 72,18 | 67,83 | 95,56  | 92,42     | 86,10 | 105,14 | 85,27 | 57,15      | 70,35 | 77,44 | 43,22  | 59,78   | 31,03 | 83,95 | 61,69 |
| <b>70-74</b> | 53,89      | 65,46 | 76,05 | 77,82  | 93,31     | 44,11 | 111,91 | 67,64 | 59,00      | 66,56 | 28,28 | 43,67  | 19,04   | 78,39 | 78,03 | 52,34 |
| <b>75-79</b> | 72,49      | 82,25 | 80,24 | 89,62  | 69,81     | 82,29 | 65,84  | 68,91 | 70,50      | 86,79 | 59,86 | 56,02  | 26,53   | 44,13 | 76,82 | 39,75 |
| Age          | La Guajira |       |       |        | Magdalena |       |        |       | San Andrés |       |       |        | Sucre   |       |       |       |
|              | 2018       | 2019  | 2020  | 2021   | 2018      | 2019  | 2020   | 2021  | 2018       | 2019  | 2020  | 2021   | 2018    | 2019  | 2020  | 2021  |
| <b>30-34</b> | 0,00       | 2,46  | 0,00  | 2,71   | 2,48      | 7,32  | 6,01   | 11,59 | 0,00       | 0,00  | 39,81 | 0,00   | 3,43    | 0,00  | 3,01  | 5,82  |
| <b>35-39</b> | 3,06       | 8,92  | 9,76  | 15,40  | 16,48     | 8,21  | 4,31   | 14,64 | 40,68      | 0,00  | 0,00  | 0,00   | 7,85    | 7,77  | 22,67 | 22,10 |
| <b>40-44</b> | 7,37       | 17,53 | 19,53 | 33,11  | 32,69     | 23,56 | 18,86  | 20,59 | 0,00       | 0,00  | 47,19 | 46,13  | 4,31    | 21,19 | 14,24 | 20,77 |
| <b>45-49</b> | 8,60       | 25,35 | 28,04 | 40,02  | 30,25     | 30,56 | 20,70  | 17,70 | 80,68      | 0,00  | 0,00  | 93,33  | 38,06   | 21,59 | 33,70 | 25,98 |
| <b>50-54</b> | 20,12      | 33,77 | 43,24 | 51,62  | 28,77     | 47,16 | 45,14  | 35,76 | 0,00       | 69,76 | 41,25 | 0,00   | 27,15   | 30,68 | 28,04 | 19,58 |
| <b>55-59</b> | 12,19      | 23,64 | 18,04 | 28,91  | 37,70     | 43,83 | 48,66  | 28,16 | 153,61     | 36,83 | 41,93 | 40,68  | 37,75   | 42,09 | 65,06 | 53,86 |
| <b>60-64</b> | 8,26       | 38,28 | 58,29 | 76,01  | 66,28     | 59,20 | 53,05  | 58,27 | 207,47     | 0,00  | 0,00  | 106,50 | 47,31   | 51,83 | 40,32 | 49,79 |
| <b>65-69</b> | 21,83      | 10,68 | 66,42 | 105,46 | 18,54     | 53,41 | 46,60  | 59,67 | 80,06      | 0,00  | 0,00  | 0,00   | 42,51   | 49,97 | 77,46 | 27,31 |
| <b>70-74</b> | 28,08      | 0,00  | 0,00  | 58,77  | 61,01     | 41,17 | 22,55  | 42,03 | 268,10     | 0,00  | 0,00  | 0,00   | 34,87   | 43,71 | 77,19 | 18,20 |
| <b>75-79</b> | 0,00       | 0,00  | 72,45 | 22,72  | 23,33     | 46,82 | 46,27  | 43,72 | 0,00       | 0,00  | 0,00  | 0,00   | 64,07   | 32,70 | 42,69 | 27,11 |

From: Cuenta de Alto Costo, 2022
